# Supplementary material
Source: PubMed Central journal article supplement (PMC7132288)
Supplement: pnas.1917834117.sapp.pdf [file pnas.1917834117.sapp.pdf]

**Supplementary Figure 1:  
Gating strategy and properties of T<sub>FH</sub> and CCR6<sup>+</sup>IL7R<sup>+</sup> T-cells**

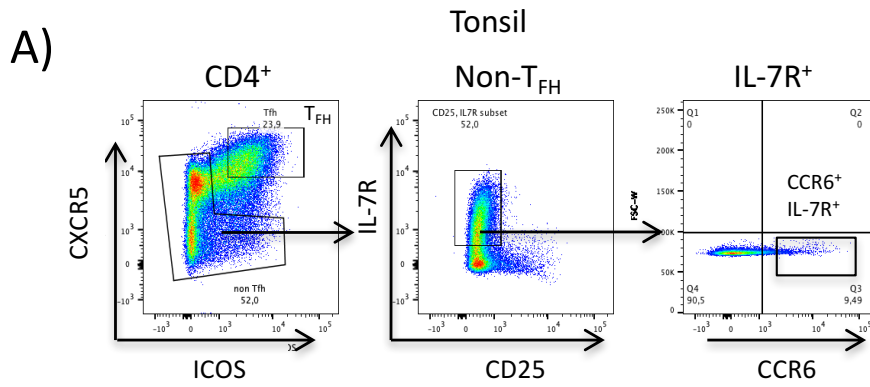

**B)** Tonsil

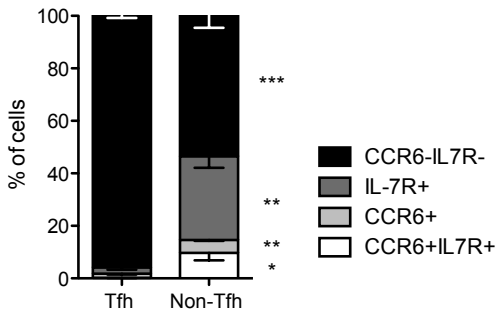

**C)** Tonsil

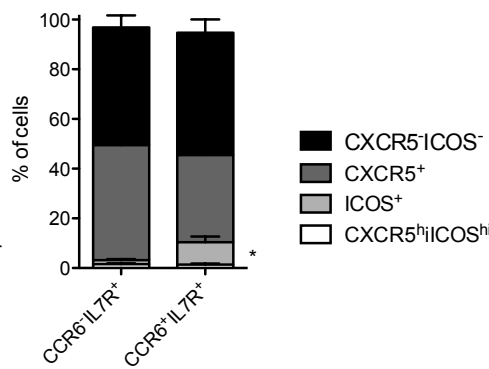

**D)** Tonsil

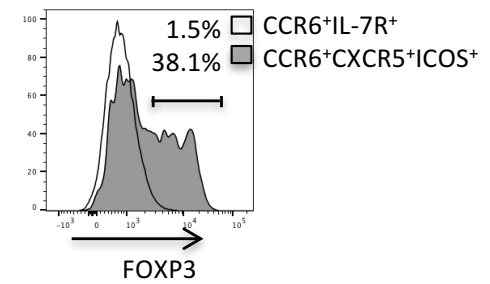

**E)** Tonsil  
CD4<sup>+</sup>IL7R<sup>+</sup>CD25<sup>lo</sup>T-cells

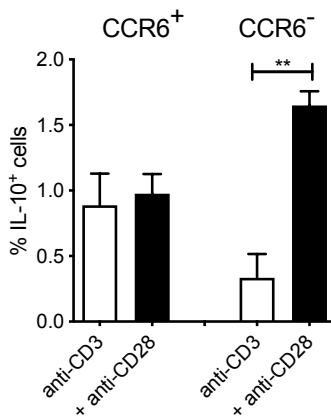

**G)**

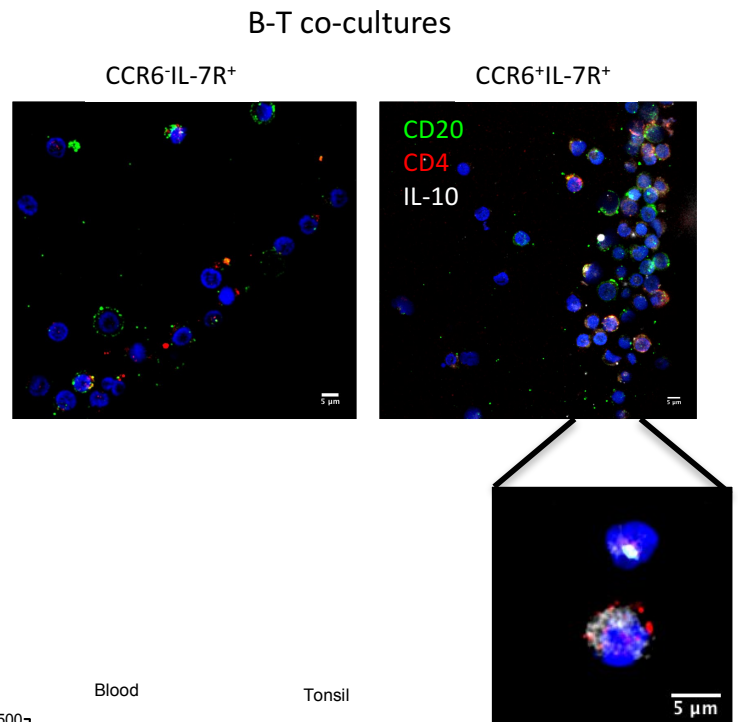

**F)** Blood  
B-T co-culture

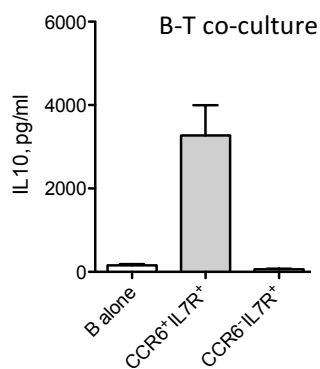

**H)**

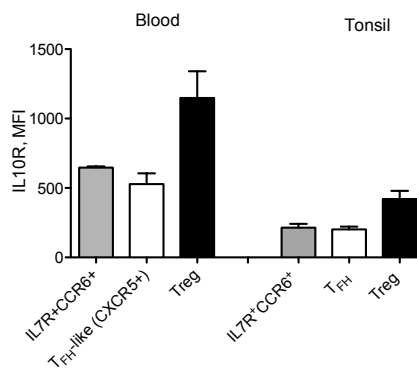

Supplementary Figure 1: **A)** Gating strategy for CXCR5<sup>+</sup>ICOS<sup>+</sup>T<sub>FH</sub>-cells and CCR6<sup>+</sup>IL7R<sup>hi</sup>CD25<sup>lo</sup>-T-cells in human tonsils. Mean percentages **B)** of CCR6 and IL7R expression among CXCR5<sup>+</sup>ICOS<sup>+</sup>T<sub>FH</sub> and non-T<sub>FH</sub>-cells and **C)** of CXCR5 and ICOS expression among tonsillar CCR6<sup>+</sup>IL7R<sup>+</sup> and CCR6<sup>-</sup>IL7R<sup>+</sup>T-cells, n=5, \*, \*\*, \*\*\* indicate statistical significances between T<sub>FH</sub> and non-T<sub>FH</sub> or CCR6<sup>+</sup>IL7R<sup>+</sup> and CCR6<sup>-</sup>IL7R<sup>+</sup>T-cells, respectively. **D)** FOXP3 expression in CCR6<sup>+</sup>IL7R<sup>+</sup>T-cells (open Histogram) and in CCR6<sup>+</sup>ICOS<sup>+</sup>CXCR5<sup>+</sup>T-cells (grey Histogram) in a representative tonsil. Numbers indicate percentages of FOXP3<sup>+</sup> cells. **E)** IL-10 production by tonsillar CCR6<sup>+</sup> and CCR6<sup>-</sup>IL7R<sup>+</sup>T-cells following 30 hours of anti-CD3 stimulation in the absence or presence of CD28 co-stimulation (n=4) **F)** IL-10 concentrations in d6 supernatants of naïve B-cells alone or together with autologous, circulating CCR6<sup>+</sup>IL7R<sup>+</sup> or CCR6<sup>-</sup>IL7R<sup>+</sup>T-cells and SEB (n=5). **G)** Immunofluorescence of IL-10 (white) in CD4<sup>+</sup>T-cells (red) in co-cultures of naïve B-cells (green) and CCR6<sup>-</sup>IL7R<sup>+</sup>T-cells (left) or CCR6<sup>+</sup>IL7R<sup>+</sup>T-cells (right). Two IL-10<sup>hi</sup>CCR6<sup>+</sup>T-cells are shown in higher magnification (right). **H)** Mean *ex vivo* IL-10R expression on CCR6<sup>+</sup>IL7R<sup>+</sup> and CXCR5<sup>+</sup>T<sub>FH</sub>-like cells in peripheral blood or CCR6<sup>+</sup>IL7R<sup>+</sup> and CXCR5<sup>+</sup>ICOS<sup>+</sup>T<sub>FH</sub> in tonsils (n=4). CD25<sup>+</sup>IL7R<sup>lo</sup>Tregs are shown as positive control.

**Supplementary Figure 2:  
Characteristics of murine IL-10<sup>+</sup>CCR6<sup>+</sup>T-cells from spleens**

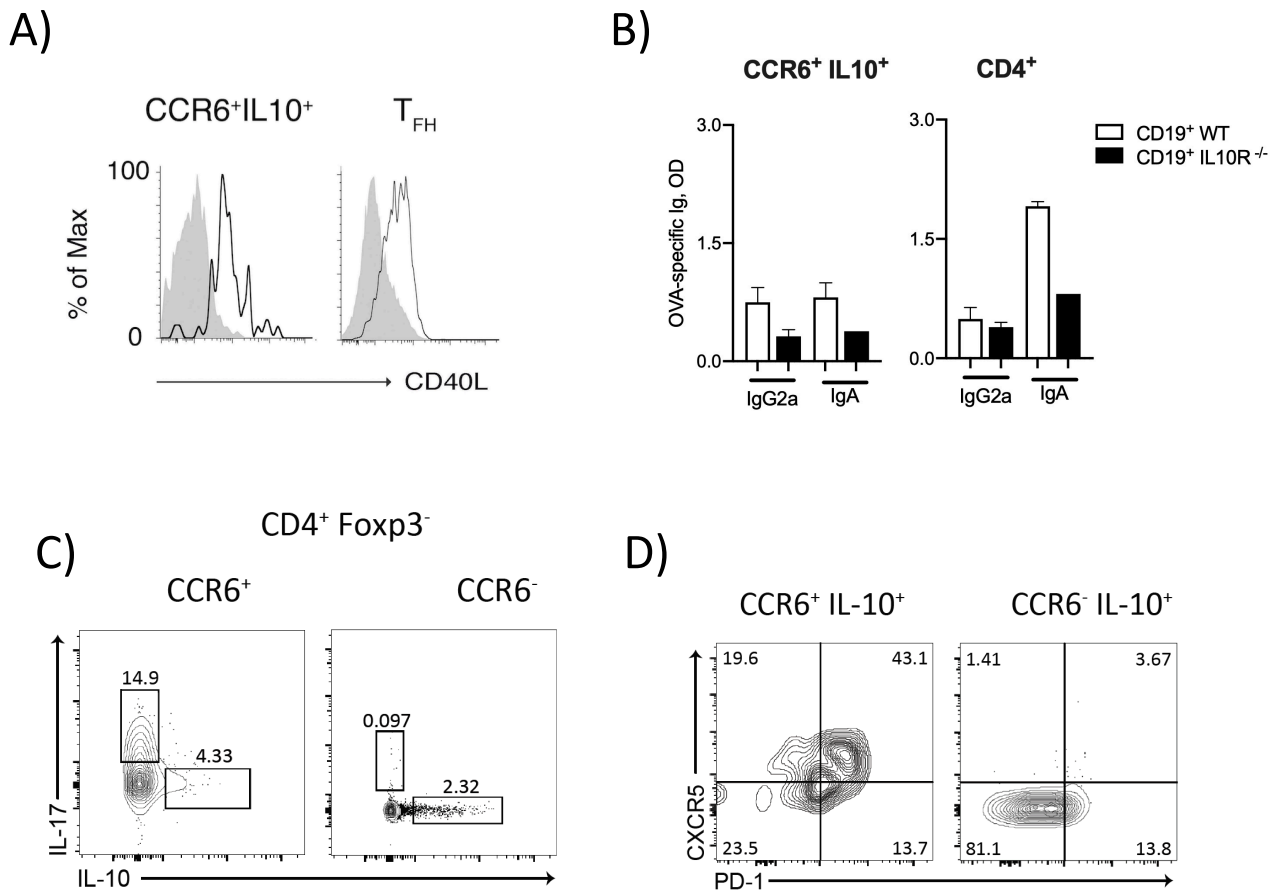

Supplementary Figure 2: **A)** CD40L expression by splenic TFH-cells and CCR6<sup>+</sup>IL-10<sup>+</sup>T-cells isolated from anti-CD3 injected FirxTiger mice. **B)** Serum levels of IgG2A and IgA following co-transfer of CCR6<sup>+</sup>IL-10<sup>+</sup>OTII T-cells and either wildtype B-cells (open Bars) or IL10R<sup>DN</sup> B-cells (filled black Bars) after 12 days following OVA vaccination (n=3). **C)** Representative IL-17 versus IL-10 reporter expression in gated CD4<sup>+</sup>FOXP3<sup>-</sup> T-cells according to CCR6 expression in triple reporter mice with lupus-like disease **D)** Representative CXCR5 and PD1 co-stainings of splenic CD4<sup>+</sup>FOXP3<sup>-</sup>IL10<sup>+</sup>T-cells according to CCR6 expression in mice with lupus-like disease.

**Supplementary Figure 3 (A/B):  
T-cell subsets and cytokines in SLE patients**

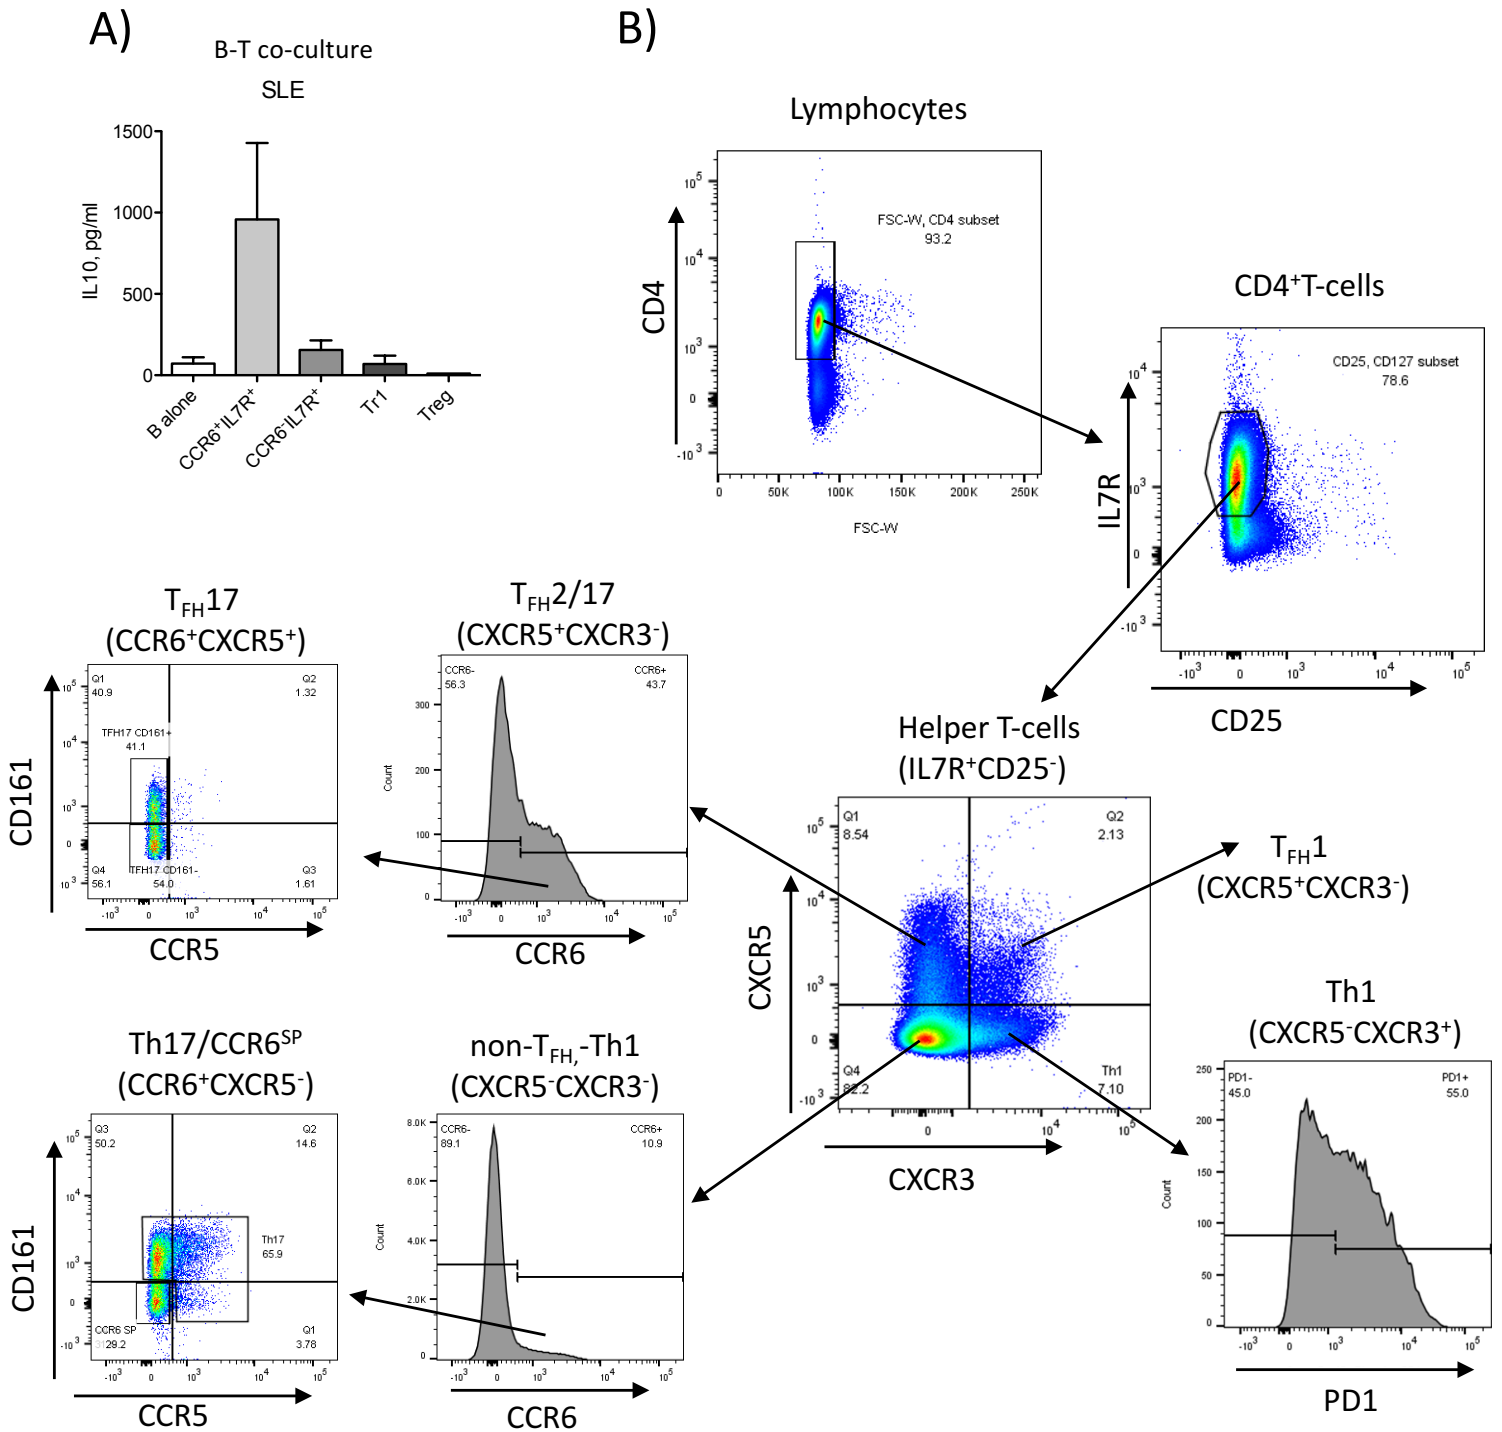

Supplementary Figure 3: **A)** IL-10 concentrations in d6 culture supernatants of B-cells from SLE patients alone or together with autologous CCR6+IL7R+ or CCR6-IL7R+T-cells and SEB (n=5) **B)** Gating strategy for T-cell subsets in human blood: Helper T-cells were gated as CD4<sup>+</sup>IL7R<sup>+</sup>CD25<sup>lo/-</sup> cells. Based on the expression of CXCR5, CXCR3 and, among CXCR3<sup>-</sup> cells, CCR6, they were further subdivided into Th1, T<sub>FH1</sub>, T<sub>FH2</sub> or T<sub>FH17</sub> cells. Th1-cells were further analyzed for PD1 to track “activated” Th1-cells; in this case IL-7R<sup>+</sup>CD25<sup>-</sup> cells were not excluded (1). Finally, CCR6<sup>+</sup>CXCR3<sup>-</sup>IL7R<sup>+</sup> helper cells were further analyzed according to CD161 and CCR5 expression, and CCR6<sup>+</sup>CXCR5<sup>-</sup> cells defined as either Th17-cells (CD161<sup>+</sup> or CCR5<sup>+</sup>) or as “CCR6<sup>SP</sup>”-T-cells (CD161<sup>-</sup> and CCR5<sup>-</sup>).

**Supplementary Figure 3 (C-F):  
T-cell subsets and cytokines in SLE patients**

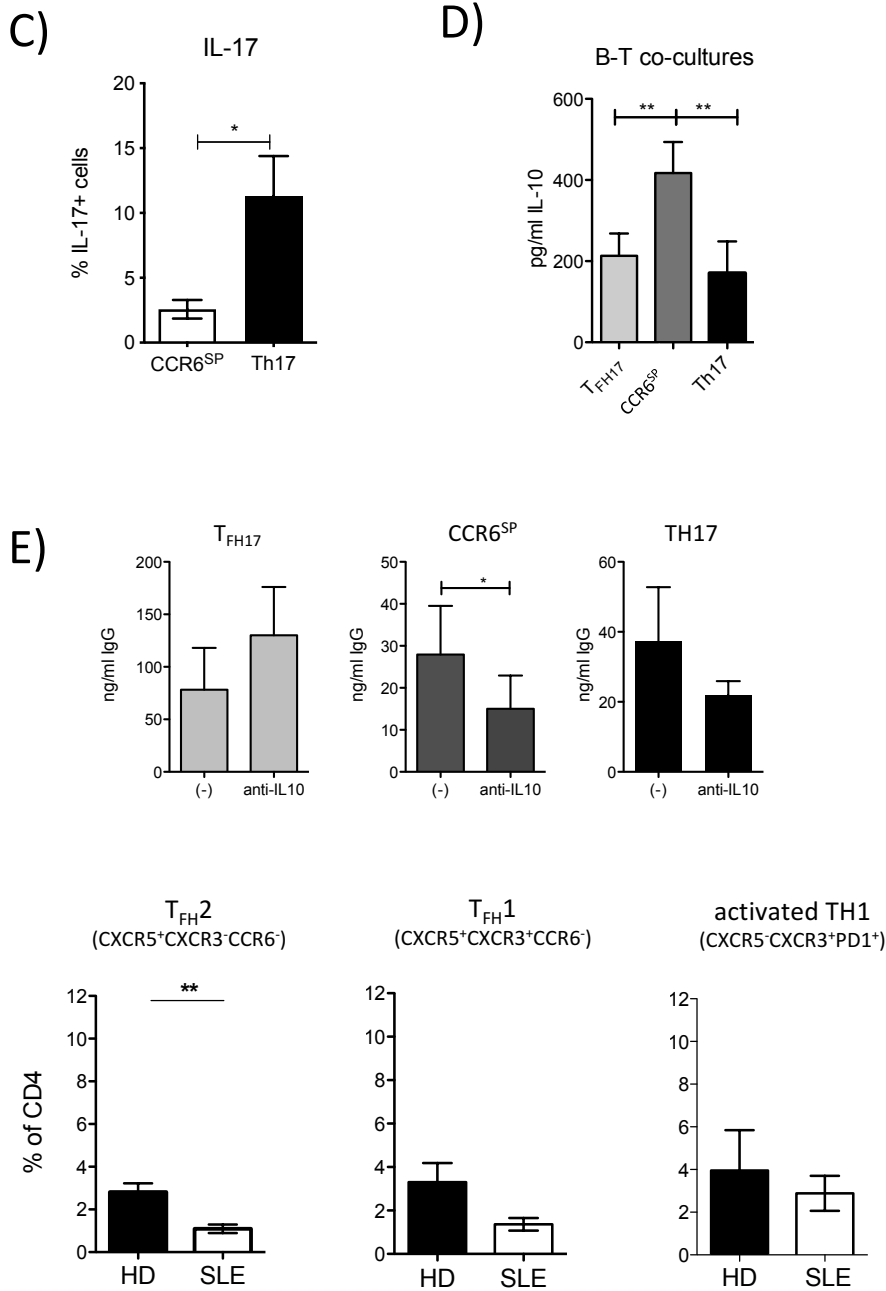

Supplementary Figure 3: **C)** IL-17 production of purified Th17-cells and CCR6<sup>SP</sup>T-cells from healthy donors after brief stimulation with PMA and Ionomycin (n=5). **D)** IL-10 and **E)** IgG concentrations were measured by ELISA in d8 culture supernatants of naive B-cells co-cultured with the indicated autologous CCR6<sup>+</sup>IL7R<sup>+</sup>T-cell subsets from healthy donors in the presence of SEB (n=5) **F)** Frequencies of other SLE-relevant T-cell subsets (T<sub>FH1</sub>, T<sub>FH2</sub> and PD1<sup>+</sup>Th1-cells (CXCR3<sup>+</sup>CXCR5<sup>-</sup>) in peripheral blood of healthy donors (n>6) and SLE patients (n>5).

**Supplementary Figure 4:  
Gene expression analysis of CCR6<sup>SP</sup>-cells**

A)

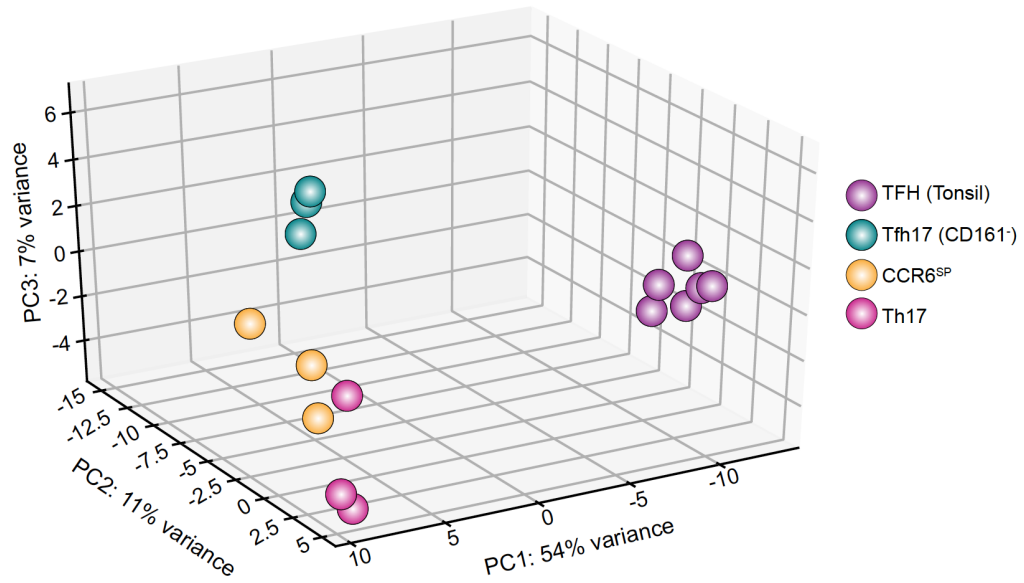

B)

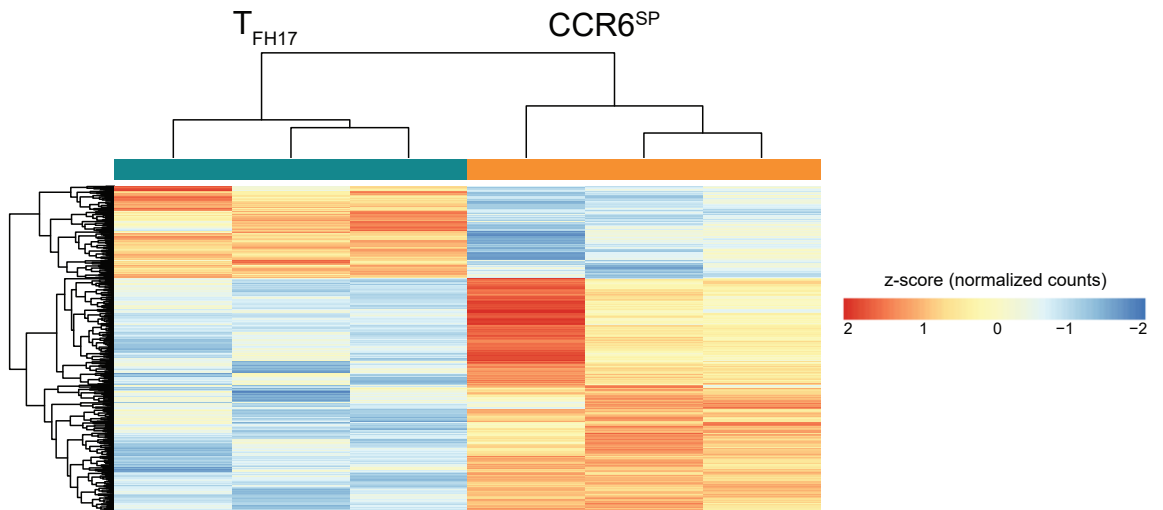

C)

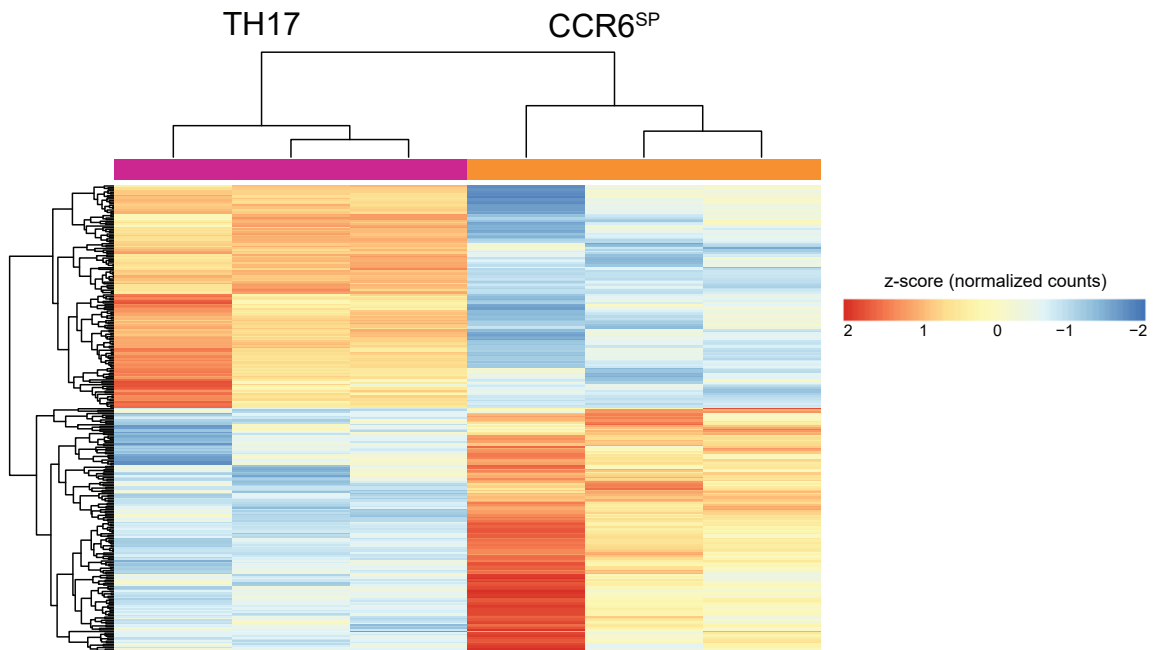

Supplementary Figure 4: **A)** Principal component analysis of tonsillar T<sub>FH</sub><sup>-</sup>, circulating T<sub>FH17</sub>-like, CCR6<sup>SP</sup>- and Th17-cells. **B/C)** Heatmaps of differentially expressed genes in CCR6<sup>SP</sup>-cells as compared to **B)** CD161-T<sub>FH17</sub>-cells (Genes are listed in Dataset S2) and **C)** to Th17-cells (Genes are listed in Dataset S3)

**Supplementary Figure 5:  
Lack of CR6<sup>+</sup>IL10<sup>+</sup>T-cells in human control lymph nodes**

non-SLE lymph node

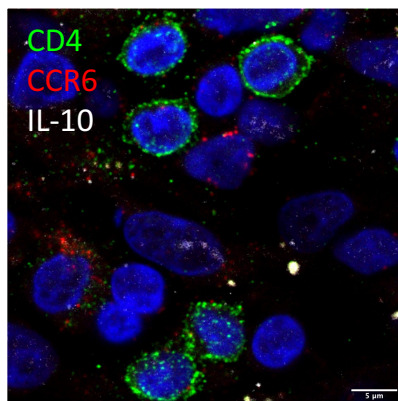

Supplementary Figure 5:

A representative confocal image of a control lymph node illustrating the absence of CD4<sup>+</sup>CCR6<sup>+</sup>IL10<sup>+</sup>T-cells.

**sTable 1. Demographic, laboratory and clinical characteristics of patients with SLE**

| Characteristics                                                       | (n=37)                    |
|-----------------------------------------------------------------------|---------------------------|
| <b>Demographic characteristics</b>                                    |                           |
| Female/Male, n                                                        | 37/5                      |
| Age, years, median (IQR)                                              | 44 (38-49)                |
| Disease duration, years, median (IQR)                                 | 19 (11-26)                |
| <b>Laboratory tests</b>                                               |                           |
| ANA positivity                                                        | 97%                       |
| anti-ENA positivity                                                   | 49%                       |
| anti-SSA/Ro                                                           | 41%                       |
| anti-Sm/RNP                                                           | 16%                       |
| anti-RNP                                                              | 5%                        |
| *anti-dsDNA positivity, n (%)                                         | 46%                       |
| medium/high titre                                                     | 41%                       |
| LA                                                                    | 27%                       |
| ‡anti-b2GPI IgG                                                       | 13%                       |
| ‡anti-CL IgG                                                          | 24%                       |
| °Hypocomplementemia                                                   | 49%                       |
| Positive Coombs test                                                  | 13%                       |
| Urinary proteins 24 h >500 mg/24                                      | 13%                       |
| Haemoglobin levels, g/dL, median (IQR)                                | 12.9 (11.7-13.9)          |
| White blood cells, number of cells per mm <sup>3</sup> , median (IQR) | 6,200 (4,400-7,800)       |
| Neutrophils                                                           | 4,300 (2,900-5,800)       |
| Lymphocytes                                                           | 1,500 (1,000-2,000)       |
| Platelets, number of cells per mm <sup>3</sup> , median (IQR)         | 225,000 (180,000-283,000) |
| <b>Disease activity and clinical manifestations</b>                   |                           |
| §SLEDAI-2K, median (min-max)                                          | 3.5 (0-24)                |
| Moderate/high activity                                                | 19%                       |
| ^BILAG-2004 numerical score, median (min-max)                         | 1 (1-36)                  |
| Moderate/high activity                                                | 30%                       |
| constitutional                                                        | 57%                       |
| mucocutaneous                                                         | 13%                       |
| neuropsychiatric                                                      | 5%                        |
| musculoskeletal                                                       | 16%                       |
| cardiorespiratory                                                     | 11%                       |
| gastrointestinal                                                      | 0%                        |
| ophthalmic                                                            | 0%                        |
| renal                                                                 | 16%                       |
| haematological                                                        | 19%                       |
| <b>Ongoing therapy</b>                                                |                           |
| Equivalent prednisone dose mg/day, median (IQR)                       | 5 (2.5-15)                |
| <b>Ongoing DMARDs</b>                                                 |                           |
| hydroxychloroquine                                                    | 68%                       |
| mycophenolate mofetil                                                 | 24%                       |
| azathioprine                                                          | 16%                       |
| methotrexate                                                          | 8%                        |
| cyclosporine                                                          | 5%                        |
| tacrolimus                                                            | 5%                        |
| rituximab                                                             | 3%                        |
| OAT                                                                   | 16%                       |
| LDA                                                                   | 32%                       |

anti-CL: anticardiolipin, anti-b2GPI: anti-b2glycoprotein I, ANA: anti-nuclear antibodies, anti-ENA: anti-extractable anti-nuclear antigens; DMARDs (Disease-Modifying Antirheumatic Drugs); IQR: inter-quartile range; LA: lupus anticoagulans; LDA: low dose acetylsalicylic acid; na: not applied; OAT oral anticoagulant therapy.

\* anti-dsDNA titres were defined as low if <40 UI/mL, medium/high if >40 UI/mL

‡ anti-b2GPI was defined as >0.40 IgG Phospholipid Units (GPL); anti-CL as >40 GPL

°Low C3 was defined as <80 mg/dL; low C4 as <15 mg/dL

§ Moderate/high activity if SLEDAI-2K>6

^ Moderate activity/high if at least one organ/system scores A or B on BILAG-2004 index; organ/system involvement is defined as grade A, B or C for each domain

## References

(1) S. Caielli *et al.*, A CD4(+) T cell population expanded in lupus blood provides B cell help through interleukin-10 and succinate. *Nat Med* **25**, 75-81 (2019).
